# Supplementary material
Source: publisher site journal article supplement (https://www.spandidos-publications.com/4306/downloadSupplementary)
Supplement: Supplementary file 1 [file downloadSupplementary]

## Sheet: Supplementary File 11
Table SXIV. The enriched number of GO biological process terms in the siDEK condition.
Term	Database	ID	Input number	Background number	P-value	Corrected P-value	Input	Hyperlink
mitotic cell cycle	Gene Ontology	GO:0000278	34	403	5.22e-07	9.5e-05	PSMD9|NUP133|DHFR|RFC4|GORASP1|PLK4|E2F5|POLE|BIRC5|XPO1|PSMF1|OPTN|NEK2|ANAPC11|ANAPC10|SKA2|OFD1|CDKN1A|CENPK|CLASP2|BUB3|SSNA1|CEP63|NUP160|STAG1|PSME3|ANAPC4|NCAPH2|CDC27|PAK1|BANF1|NUP155|CNTRL|CSNK1E	http://amigo.geneontology.org/amigo/term/GO:0000278
gene expression	Gene Ontology	GO:0010467	45	672	4.95e-06	0.000450529	SARS2|SLBP|PSMD9|NCBP2|PSMF1|UBE2D3|AKT1|HNRNPH1|TXNL4A|MED8|HARS|NCOR2|NCOR1|PPM1A|XPO1|DGCR8|RPL29|RARG|POLR3H|NR2C2AP|RPL23|PCF11|MED15|MED16|PTBP1|RPS24|SNUPN|LSM7|WARS|PRMT5|PPARG|NR2C1|BRF1|CNOT1|E2F5|RPL26L1|SNRPD2|PSME3|RPL32|PAIP1|ADARB1|GTF3A|TARBP2|SSR4|POLR1D	http://amigo.geneontology.org/amigo/term/GO:0010467
apoptotic process	Gene Ontology	GO:0006915	39	605	5.02e-05	0.0030476	PTK2|PSMD9|SPTAN1|PSMF1|TNFRSF19|UBE2D3|BAX|AKT1|DPF1|IKBKG|BBC3|EIF5A|TPX2|GADD45A|ZNF385A|MAP3K7|CDK11A|STK24|PACS2|PML|MAPK8|GSN|BIRC5|TNS4|PSME3|DFFA|TNIP2|STK4|ATG4D|ING4|CIDEB|TAOK2|IRF3|NME6|PDCD6IP|CASP8|C1D|MEF2D|PAK1	http://amigo.geneontology.org/amigo/term/GO:0006915
viral reproduction	Gene Ontology	GO:0016032	36	555	8.65e-05	0.00366898	PSMD9|NUP133|PSMF1|BAX|IKBKG|AP2B1|XPO1|AP2S1|RPL29|NCBP2|ITGB6|RPL23|RBM15|PML|AP1B1|ACY3|UBE2I|RPS24|RAC1|NUP160|CD46|PSME3|NMT2|AP2A2|BRD4|PSIP1|RHOA|PACS2|IRF3|RPL26L1|RPL32|PDCD6IP|CASP8|BANF1|NUP155|SP100	http://amigo.geneontology.org/amigo/term/GO:0016032
execution phase of apoptosis	Gene Ontology	GO:0097194	6	24	0.000100796	0.00366898	CASP8|AKT1|STK24|MCL1|BBC3|CIDEB	http://amigo.geneontology.org/amigo/term/GO:0097194
positive regulation of I-kappaB kinase/NF-kappaB cascade	Gene Ontology	GO:0043123	15	153	0.00016218	0.00423857	IRF3|PPM1A|TFG|MAP3K7|MIB2|TNIP2|RHOC|CASP8|IKBKG|CANT1|BRD4|UBE2V1|RHOA|TNFRSF19|RNF31	http://amigo.geneontology.org/amigo/term/GO:0043123
protein K11-linked ubiquitination	Gene Ontology	GO:0070979	6	26	0.000163022	0.00423857	CDC27|ANAPC11|UBE2D3|ANAPC13|ANAPC10|ANAPC4	http://amigo.geneontology.org/amigo/term/GO:0070979
G2/M transition of mitotic cell cycle	Gene Ontology	GO:0000086	14	143	0.000269789	0.0061377	PLCB1|OPTN|NEK2|SSNA1|CEP63|BIRC5|PLK4|OFD1|ANAPC10|CSNK1E|CDKN1A|CNTRL|ANAPC4|CHEK1	http://amigo.geneontology.org/amigo/term/GO:0000086
transcription, DNA-dependent	Gene Ontology	GO:0006351	87	1857	0.000391398	0.00791493	SMARCC2|SETD1B|IKBKG|ZNF76|USP21|ZNF384|ZNF354B|MAP3K7|ZNF574|KDM2B|ZNF664|CCNL1|ZNF44|PRMT5|TNIP2|PER1|BRD4|PCGF1|PCGF3|PCGF5|PTMA|ZNF761|RFX5|HDAC11|ZBTB21|ZNF195|UBE2D3|ARNTL|CHD3|ZNF226|PPM1A|SUB1|ASXL1|POLR3H|RBM39|ZBTB37|UBP1|TCF3|MLLT10|COL4A2|SUV420H2|PSIP1|MEF2D|ZNF385A|DPF1|HDAC6|ZNF235|SCYL1|NCOR2|NCOR1|NCOA2|PHTF1|NCOA1|TMEM18|PML|TCF25|MORF4L2|GABPB1|ZNF83|TCEAL3|ZNF808|LRRFIP1|GTF2H…	http://amigo.geneontology.org/amigo/term/GO:0006351
cell division	Gene Ontology	GO:0051301	10	88	0.000622369	0.0113271	CCDC124|LLGL2|CDC27|TACC1|BIRC5|PDCD6IP|PRPF40A|IST1|SKA2|CNTRL	http://amigo.geneontology.org/amigo/term/GO:0051301
cellular component disassembly involved in apoptotic process	Gene Ontology	GO:0006921	7	48	0.00092328	0.0141105	PTK2|SPTAN1|DFFA|CASP8|CAPN10|STK24|GSN	http://amigo.geneontology.org/amigo/term/GO:0006921
negative regulation of protein kinase activity	Gene Ontology	GO:0006469	8	62	0.000930361	0.0141105	PRKRIP1|TRIB2|AKT1|GADD45A|TARBP2|AKT1S1|TSC2|ITGB1BP1	http://amigo.geneontology.org/amigo/term/GO:0006469
mitosis	Gene Ontology	GO:0007067	18	243	0.00118313	0.0165638	UBE2I|TPX2|NEK2|CLASP2|CEP63|HMGA2|BIRC5|STAG1|ANAPC11|ANAPC10|ANAPC13|CDK11A|BOD1|SKA2|TXNL4A|OFD1|ANAPC4|SEPT2	http://amigo.geneontology.org/amigo/term/GO:0007067
negative regulation of ubiquitin-protein ligase activity involved in mitotic cell cycle	Gene Ontology	GO:0051436	8	65	0.00127444	0.0165678	PSMD9|BUB3|CDC27|PSMF1|ANAPC11|PSME3|ANAPC10|ANAPC4	http://amigo.geneontology.org/amigo/term/GO:0051436
negative regulation of DNA binding	Gene Ontology	GO:0043392	5	27	0.00168587	0.0204553	HMGA2|CTNNBIP1|NEK2|RSF1|SP100	http://amigo.geneontology.org/amigo/term/GO:0043392
regulation of defense response to virus by virus	Gene Ontology	GO:0050690	5	28	0.00199753	0.0224964	AP1B1|AP2S1|RAC1|AP2B1|AP2A2	http://amigo.geneontology.org/amigo/term/GO:0050690
regulation of transcription, DNA-dependent	Gene Ontology	GO:0006355	62	1305	0.00210857	0.0224964	CCNL1|DPF1|ZNF235|SCYL1|SETD1B|KMT2C|KRBOX4|ZNF814|ARNTL|ZNF7|ZNF600|NCOA1|CSDE1|MZF1|ZNF354B|ASXL1|ZNF385A|ZNF33A|RBM39|ZNF574|ZNF768|CHD3|PML|TARBP2|ZNF761|ZNF226|ZBTB37|ZMYM2|ZNF721|ZNF44|PFDN5|PSIP1|TCF3|ZNF83|MEF2D|HMGA2|CDK11A|PRMT5|TCEAL3|ZNF808|NCOA2|UBE2V1|BRF1|INO80C|SUV420H2|CHD4|PCGF1|PCGF3|ZNF195|RFX5|MEAF6|SUPT7L|ZNF888|GTF3A|PCGF5|ZNF33B|ZBTB45|GTF2H2C|HDAC11|ZBTB21|CAPN15|ZNF664	http://amigo.geneontology.org/amigo/term/GO:0006355
regulation of cell growth	Gene Ontology	GO:0001558	8	71	0.00226274	0.0224964	EBAG9|SOCS2|MFI2|DDR1|CDK11A|STK11|CAMK2D|TAOK2	http://amigo.geneontology.org/amigo/term/GO:0001558
protein phosphorylation	Gene Ontology	GO:0006468	22	344	0.00239745	0.0224964	BIRC5|STK11|PLK4|AKT1|TRIB2|NEK2|CDK16|PXK|CSNK1E|MARK2|CDKN1A|CAMK2D|CDK11A|MAST2|STK4|STK24|BRD4|RSRC1|CAMKK2|MAP3K13|DGUOK|PAK1	http://amigo.geneontology.org/amigo/term/GO:0006468
protein autophosphorylation	Gene Ontology	GO:0046777	13	161	0.00261457	0.0224964	PTK2|NEK2|CAMKK2|CAMK2D|DDR1|MAP3K13|STK11|AKT1|STK24|ATR|MARK2|STK4|PAK1	http://amigo.geneontology.org/amigo/term/GO:0046777
glycerophospholipid biosynthetic process	Gene Ontology	GO:0046474	9	89	0.00261811	0.0224964	SLC44A3|PLD3|PTPMT1|PLA2G6|PNPLA2|AGPAT3|PHOSPHO1|PGS1|CHKA	http://amigo.geneontology.org/amigo/term/GO:0046474
cellular response to hormone stimulus	Gene Ontology	GO:0032870	5	30	0.0027439	0.0224964	PGF|NCOA1|ASNS|UCP3|SOCS2	http://amigo.geneontology.org/amigo/term/GO:0032870
intrinsic apoptotic signaling pathway	Gene Ontology	GO:0097193	7	58	0.00284295	0.0224964	CDKN1A|CASP8|AKT1|BAX|HRAS|MAPK8|BBC3	http://amigo.geneontology.org/amigo/term/GO:0097193
regulation of ubiquitin-protein ligase activity involved in mitotic cell cycle	Gene Ontology	GO:0051439	8	75	0.00320112	0.0242752	PSMD9|BUB3|CDC27|PSMF1|ANAPC11|PSME3|ANAPC10|ANAPC4	http://amigo.geneontology.org/amigo/term/GO:0051439
RNA metabolic process	Gene Ontology	GO:0016070	17	247	0.0034565	0.0251633	XPO1|RPS24|LSM7|RPL29|SNRPD2|NCBP2|PSMF1|SNUPN|RPL32|PSME3|RPL23|PRMT5|AKT1|PAIP1|PSMD9|CNOT1|RPL26L1	http://amigo.geneontology.org/amigo/term/GO:0016070
mitotic cell cycle spindle assembly checkpoint	Gene Ontology	GO:0007094	5	32	0.00367361	0.0257153	CDC27|ANAPC11|ANAPC4|BUB3|ANAPC10	http://amigo.geneontology.org/amigo/term/GO:0007094
response to DNA damage stimulus	Gene Ontology	GO:0006974	13	169	0.00397189	0.0265487	IRF3|MRE11A|CDKN1A|STK11|ATR|IKBKG|MACROD1|BRD4|BBC3|APTX|ZNF385A|TAOK2|CHEK1	http://amigo.geneontology.org/amigo/term/GO:0006974
nucleobase-containing small molecule metabolic process	Gene Ontology	GO:0055086	8	78	0.00408442	0.0265487	GSR|UCK1|AK2|GUK1|RRM2B|DGUOK|GMPR2|PFAS	http://amigo.geneontology.org/amigo/term/GO:0055086
positive regulation of type I interferon production	Gene Ontology	GO:0032481	7	63	0.00454531	0.0282378	IRF3|MRE11A|LRRFIP1|PRKDC|POLR1D|IKBKG|POLR3H	http://amigo.geneontology.org/amigo/term/GO:0032481
anaphase-promoting complex-dependent proteasomal ubiquitin-dependent protein catabolic process	Gene Ontology	GO:0031145	8	80	0.00477027	0.0282378	PSMD9|BUB3|CDC27|PSMF1|ANAPC11|PSME3|ANAPC10|ANAPC4	http://amigo.geneontology.org/amigo/term/GO:0031145
negative regulation of epidermal growth factor receptor signaling pathway	Gene Ontology	GO:0042059	5	34	0.00480974	0.0282378	CBLC|AP2S1|EPN1|AP2B1|AP2A2	http://amigo.geneontology.org/amigo/term/GO:0042059
small molecule metabolic process	Gene Ontology	GO:0044281	64	1413	0.00538939	0.0300163	PCK2|GSR|PSMD9|PI4KB|NUP133|DHFR|GLA|PSMF1|STK11|NADSYN1|OAZ3|AKT1|PGS1|PYCR1|NCOR2|NCOR1|ATP5D|NCOA2|NDUFV1|NCOA1|HPGD|SLC37A4|IDH3B|AFMID|CHKA|PLA2G6|PNPLA2|TIAM2|RRM2B|GBE1|PHOSPHO1|MRI1|GMPR2|BSG|PTPMT1|PFAS|PKM|ETFA|PLCB1|SLC44A3|UCK1|NAT1|EBP|RAP1B|NDOR1|NUP160|ENO3|GUK1|UCP3|THTPA|CYP1A1|B4GALT2|BMP1|PLD3|AK2|PSME3|GSTM4|ASNS|ACSL4|PCCA|AGPAT3|PNPO|NUP155|DGUOK	http://amigo.geneontology.org/amigo/term/GO:0044281
DNA repair	Gene Ontology	GO:0006281	18	280	0.00544251	0.0300163	SMUG1|MRE11A|FAAP100|PARPBP|RFC4|UBE2D3|MORF4L2|PRKDC|POLE|CSNK1E|ATR|GADD45A|DDB2|RRM2B|INO80C|RPAIN|ENDOV|CHEK1	http://amigo.geneontology.org/amigo/term/GO:0006281
intracellular protein transport	Gene Ontology	GO:0006886	14	200	0.00656832	0.0351598	XPO1|AP2S1|SNX11|HDAC6|STX16-NPEPL1|AP4M1|STX2|ACD|AP2A2|PDCD6|SAR1A|AP1B1|AP2B1|MLPH	http://amigo.geneontology.org/amigo/term/GO:0006886
circadian regulation of gene expression	Gene Ontology	GO:0032922	5	38	0.00779188	0.0405178	PML|ARNTL|PER1|CSNK1E|NCOR1	http://amigo.geneontology.org/amigo/term/GO:0032922
transforming growth factor beta receptor signaling pathway	Gene Ontology	GO:0007179	10	125	0.0083427	0.0408169	XPO1|E2F5|HPGD|PPM1A|UBE2D3|MAP3K7|PML|RHOA|NCOR2|NCOR1	http://amigo.geneontology.org/amigo/term/GO:0007179
response to retinoic acid	Gene Ontology	GO:0032526	6	54	0.00841243	0.0408169	NCOA1|RARG|ASXL1|PPARG|DNAAF2|SP100	http://amigo.geneontology.org/amigo/term/GO:0032526
positive regulation of ubiquitin-protein ligase activity involved in mitotic cell cycle	Gene Ontology	GO:0051437	7	71	0.00873251	0.0408169	PSMD9|CDC27|PSMF1|ANAPC11|PSME3|ANAPC10|ANAPC4	http://amigo.geneontology.org/amigo/term/GO:0051437
transcription initiation from RNA polymerase II promoter	Gene Ontology	GO:0006367	13	186	0.00874648	0.0408169	E2F5|RARG|PPM1A|MAZ|UBE2D3|NR2C2AP|PPARG|NR2C1|MED15|MED16|MED8|NCOR2|NCOR1	http://amigo.geneontology.org/amigo/term/GO:0006367
JNK cascade	Gene Ontology	GO:0007254	6	57	0.0108861	0.0495319	MAP3K7|MAP3K13|SH2D3A|MAPK8|TNFRSF19|IKBKG	http://amigo.geneontology.org/amigo/term/GO:0007254
cell junction assembly	Gene Ontology	GO:0034329	7	75	0.0116566	0.05077	ACTN1|LAMA3|JUP|PVRL2|LAMC2|FBLIM1|LAMB3	http://amigo.geneontology.org/amigo/term/GO:0034329
histone H3 acetylation	Gene Ontology	GO:0043966	5	42	0.0118641	0.05077	ING4|PER1|MAP3K7|TCF3|SUPT7L	http://amigo.geneontology.org/amigo/term/GO:0043966
cell cycle arrest	Gene Ontology	GO:0007050	10	132	0.0119951	0.05077	PPM1A|CDKN3|GADD45A|CDKN1A|STK11|PML|SGSM3|ING4|TSC2|HRAS	http://amigo.geneontology.org/amigo/term/GO:0007050
positive regulation of sequence-specific DNA binding transcription factor activity	Gene Ontology	GO:0051091	8	94	0.0123193	0.0509573	UBE2I|TRIM14|TCF3|PPARG|HMGA2|AKT1|JUP|SP100	http://amigo.geneontology.org/amigo/term/GO:0051091
activation of cysteine-type endopeptidase activity involved in apoptotic process	Gene Ontology	GO:0006919	7	78	0.0142722	0.0549004	PPARG|CASP8|PDCD6|CARD8|BAX|PML|BBC3	http://amigo.geneontology.org/amigo/term/GO:0006919
response to UV	Gene Ontology	GO:0009411	5	44	0.0143588	0.0549004	DDB2|PML|CDKN1A|RPAIN|MAPK8	http://amigo.geneontology.org/amigo/term/GO:0009411
nucleobase-containing compound metabolic process	Gene Ontology	GO:0006139	5	44	0.0143588	0.0549004	AK2|METTL4|POLR3H|METTL14|DGUOK	http://amigo.geneontology.org/amigo/term/GO:0006139
apoptotic signaling pathway	Gene Ontology	GO:0097190	9	116	0.0144792	0.0549004	APH1A|ARHGEF16|RAC1|BAX|TIAM2|CASP8|PDCD6|MAPK8|BBC3	http://amigo.geneontology.org/amigo/term/GO:0097190
phospholipid metabolic process	Gene Ontology	GO:0006644	11	157	0.0149352	0.0554736	ASPG|PI4KB|PLD3|PTPMT1|PLA2G6|PNPLA2|SLC44A3|AGPAT3|PHOSPHO1|PGS1|CHKA	http://amigo.geneontology.org/amigo/term/GO:0006644
toll-like receptor 3 signaling pathway	Gene Ontology	GO:0034138	7	80	0.0162334	0.0590895	IRF3|UBE2D3|CASP8|MAP3K7|TNIP2|IKBKG|MAPK8	http://amigo.geneontology.org/amigo/term/GO:0034138
mRNA metabolic process	Gene Ontology	GO:0016071	14	224	0.0166429	0.0593922	XPO1|RPS24|RPL29|NCBP2|PSMF1|LSM7|RPL32|PSME3|PAIP1|AKT1|RPL23|PSMD9|CNOT1|RPL26L1	http://amigo.geneontology.org/amigo/term/GO:0016071
mRNA export from nucleus	Gene Ontology	GO:0006406	6	64	0.0185761	0.0648341	SLBP|NCBP2|NUP133|NUP160|NUP155|EIF5A	http://amigo.geneontology.org/amigo/term/GO:0006406
nerve growth factor receptor signaling pathway	Gene Ontology	GO:0048011	16	273	0.0190641	0.0648341	MAPK8|AP2S1|RALGDS|ARHGEF16|SHC3|HRAS|RAC1|APH1A|AKT1|TIAM2|AKT1S1|CDKN1A|AP2A2|RHOA|TSC2|AP2B1	http://amigo.geneontology.org/amigo/term/GO:0048011
chromosome segregation	Gene Ontology	GO:0007059	6	65	0.0199153	0.0648341	UBE2I|NEK2|BIRC5|STAG1|SKA2|BRD4	http://amigo.geneontology.org/amigo/term/GO:0007059
peptidyl-serine phosphorylation	Gene Ontology	GO:0018105	6	65	0.0199153	0.0648341	CAMK2D|PRKDC|AKT1|STK4|ATR|MAPK8	http://amigo.geneontology.org/amigo/term/GO:0018105
negative regulation of transcription, DNA-dependent	Gene Ontology	GO:0045892	24	464	0.0199489	0.0648341	SMARCC2|HDAC6|BIRC5|ELF2|CBX1|EHMT1|LOXL3|RBM15|PML|UBP1|ARNTL|PFDN5|PLCB1|SUV39H2|HMGA2|RSF1|PPARG|PER1|ING4|UBE2I|LRRFIP1|C1D|ZBTB21|SP100	http://amigo.geneontology.org/amigo/term/GO:0045892
glucose homeostasis	Gene Ontology	GO:0042593	7	84	0.0207145	0.066141	TMEM256-PLSCR3|SLC37A4|HECTD4|PPARG|STK11|AKT1|NCOR2	http://amigo.geneontology.org/amigo/term/GO:0042593
endocytosis	Gene Ontology	GO:0006897	9	125	0.0224824	0.0705483	AP2S1|RUFY1|HRAS|EPN1|DNM1|AP2A2|RABEP2|TSC2|AP2B1	http://amigo.geneontology.org/amigo/term/GO:0006897
cell migration	Gene Ontology	GO:0016477	9	126	0.0235346	0.0725983	AVL9|CLASP2|NCK2|TMEM18|LRRC16A|PRPF40A|JUP|ITGB1BP1|TAOK2	http://amigo.geneontology.org/amigo/term/GO:0016477
vesicle-mediated transport	Gene Ontology	GO:0016192	11	169	0.0243662	0.0739108	AP2S1|AP4M1|STX16-NPEPL1|VAMP3|MON2|AP2A2|SAR1A|AP1B1|TSC2|AP2B1|GSN	http://amigo.geneontology.org/amigo/term/GO:0016192
cell cycle	Gene Ontology	GO:0007049	13	214	0.0252539	0.0748162	NASP|CCDC124|LLGL2|DDX12P|TACC1|PSRC1|PDCD6IP|PRPF40A|ATR|SEPT8|BLCAP|GAK|SEPT2	http://amigo.geneontology.org/amigo/term/GO:0007049
protein transport	Gene Ontology	GO:0015031	21	402	0.025714	0.0748162	MVP|NASP|BBIP1|TMED3|NUP133|RABEP2|ITGB1BP1|NUP160|RSG1|PDCD6IP|AP4M1|ATG4B|COG8|UEVLD|MON2|GORASP1|ATG4D|DENND1B|PLEKHA8|NPIPA1|VPS54	http://amigo.geneontology.org/amigo/term/GO:0015031
innate immune response	Gene Ontology	GO:0045087	35	754	0.0258979	0.0748162	PTK2|TRIM14|HRAS|UBE2D3|PRKDC|AKT1|POLR1D|IKBKG|TSC2|POLR3H|OTUD5|MRE11A|MAP3K7|PLA2G6|AKT1S1|PML|MAPK8|CDKN1A|APOL1|RAC1|CD46|AGER|PPARG|ATG12|F12|UBE2V1|APOBEC3H|IRF3|LRRFIP1|APOBEC3F|CASP8|ADARB1|BAIAP2|CHID1|PAK1	http://amigo.geneontology.org/amigo/term/GO:0045087
ubiquitin-dependent protein catabolic process	Gene Ontology	GO:0006511	11	174	0.0293614	0.082388	UBE2I|PSMD9|PSMF1|UBE2D3|ANAPC10|UBA6|FBXO21|FBXL12|BAG6|ANAPC4|USP21	http://amigo.geneontology.org/amigo/term/GO:0006511
regulation of cyclin-dependent protein kinase activity	Gene Ontology	GO:0000079	5	53	0.029877	0.082388	CCNL1|GADD45A|CCNYL1|CDKN3|CDKN1A	http://amigo.geneontology.org/amigo/term/GO:0000079
telomere maintenance	Gene Ontology	GO:0000723	5	53	0.029877	0.082388	SP100|RFC4|POLE|ACD|PRKDC	http://amigo.geneontology.org/amigo/term/GO:0000723
negative regulation of transcription from RNA polymerase II promoter	Gene Ontology	GO:0000122	27	565	0.0343952	0.0909743	UBE2D3|NCOA2|ZNF496|N4BP2L2|NCOR2|NCOR1|EHMT1|RARG|ASXL1|HNF1B|JUP|TCF25|CNOT1|KDM2B|NFIC|XPO1|HMGA2|PRMT5|PPARG|PER1|NR2C1|UBE2I|PPM1A|RFX5|CTNNBIP1|IRF3|SP100	http://amigo.geneontology.org/amigo/term/GO:0000122
RNA splicing	Gene Ontology	GO:0008380	14	247	0.0346607	0.0909743	ARL6IP4|SNRPD2|NCBP2|USB1|RSRC1|LSM7|PRPF40A|PCF11|U2AF1L4|HNRNPH1|PTBP3|TXNL4A|PTBP1|RBM39	http://amigo.geneontology.org/amigo/term/GO:0008380
positive regulation of apoptotic process	Gene Ontology	GO:0043065	16	294	0.0346771	0.0909743	APH1A|NCOA1|ARHGEF16|RARG|RAC1|GADD45A|HMGA2|DFFA|BAX|PRKDC|AKT1|TIAM2|STK4|ZNF346|ING4|MAPK8	http://amigo.geneontology.org/amigo/term/GO:0043065
embryo development	Gene Ontology	GO:0009790	6	74	0.0349901	0.0909743	EHMT1|PTK2|BAG6|BIRC5|CELF1|LSR	http://amigo.geneontology.org/amigo/term/GO:0009790
positive regulation of JNK cascade	Gene Ontology	GO:0046330	5	56	0.036742	0.0922943	PLCB1|HRAS|MAP3K7|TAOK2|GADD45A	http://amigo.geneontology.org/amigo/term/GO:0046330
DNA damage response, signal transduction resulting in induction of apoptosis	Gene Ontology	GO:0008630	5	56	0.036742	0.0922943	PML|CIDEB|MCL1|BAX|PRKDC	http://amigo.geneontology.org/amigo/term/GO:0008630
exocytosis	Gene Ontology	GO:0006887	6	75	0.0370191	0.0922943	RAB27A|VAMP3|LLGL2|CDK16|RSG1|PAK1	http://amigo.geneontology.org/amigo/term/GO:0006887
TRIF-dependent toll-like receptor signaling pathway	Gene Ontology	GO:0035666	6	76	0.0391219	0.0948006	IRF3|UBE2D3|CASP8|MAP3K7|IKBKG|MAPK8	http://amigo.geneontology.org/amigo/term/GO:0035666
toll-like receptor 4 signaling pathway	Gene Ontology	GO:0034142	7	96	0.0391458	0.0948006	IRF3|UBE2D3|CASP8|MAP3K7|IKBKG|UBE2V1|MAPK8	http://amigo.geneontology.org/amigo/term/GO:0034142
protein polyubiquitination	Gene Ontology	GO:0000209	8	117	0.0395871	0.0948006	PSMD9|HDAC6|PSMF1|PSME3|UBE2D3|DDB2|UBE2V1|RNF31	http://amigo.geneontology.org/amigo/term/GO:0000209
protein heterooligomerization	Gene Ontology	GO:0051291	5	58	0.0418143	0.098318	JUP|STK11|TSC2|HRAS|CASP8	http://amigo.geneontology.org/amigo/term/GO:0051291
actin cytoskeleton organization	Gene Ontology	GO:0030036	9	140	0.0421363	0.098318	KLHL17|HRAS|ARHGEF5|MON2|ARHGAP26|RAC1|SSH1|RHOA|TAOK2	http://amigo.geneontology.org/amigo/term/GO:0030036
MyD88-independent toll-like receptor signaling pathway	Gene Ontology	GO:0002756	6	78	0.0435514	0.100334	IRF3|MAP3K7|CASP8|UBE2D3|IKBKG|MAPK8	http://amigo.geneontology.org/amigo/term/GO:0002756
glucose metabolic process	Gene Ontology	GO:0006006	8	120	0.0448704	0.10208	PCK2|HECTD4|SLC37A4|AKT1|ENO3|GBE1|GAA|PKM	http://amigo.geneontology.org/amigo/term/GO:0006006
cellular response to insulin stimulus	Gene Ontology	GO:0032869	5	61	0.0501781	0.112746	PRKDC|AKT1|CAPN10|PAK1|PPARG	http://amigo.geneontology.org/amigo/term/GO:0032869
epidermal growth factor receptor signaling pathway	Gene Ontology	GO:0007173	11	191	0.0517777	0.114921	AP2S1|NCK2|SHC3|CDKN1A|EPN1|AP2B1|AKT1|AKT1S1|AP2A2|TSC2|HRAS	http://amigo.geneontology.org/amigo/term/GO:0007173
glucose transport	Gene Ontology	GO:0015758	5	62	0.0531688	0.116587	AKT1|NUP160|NUP133|SLC37A4|NUP155	http://amigo.geneontology.org/amigo/term/GO:0015758
positive regulation of transcription from RNA polymerase II promoter	Gene Ontology	GO:0045944	33	749	0.0548699	0.118885	MC1R|HRAS|PRKDC|AKT1|IKBKG|ITGB1BP1|ARNTL|ZNF384|RARG|BCL2L12|ASXL1|HNF1B|MORF4L2|NCOA2|GABPB1|CENPK|TCF3|HMGA2|MLLT10|TNIP2|PPARG|PER1|NCOA1|ZMIZ2|BRD4|NFIC|E2F5|PSIP1|NCK2|MAZ|BCL9|MEF2D|WBP2	http://amigo.geneontology.org/amigo/term/GO:0045944
mRNA processing	Gene Ontology	GO:0006397	11	195	0.0583764	0.124994	ARL6IP4|USB1|LSM7|CELF1|ADARB1|U2AF1L4|PRPF40A|PAPD4|PTBP3|PTBP1|RBM39	http://amigo.geneontology.org/amigo/term/GO:0006397
cellular lipid metabolic process	Gene Ontology	GO:0044255	9	151	0.0623237	0.131894	NCOA2|CYP1A1|NCOA1|PCCA|ACSL4|TIAM2|AGPAT3|NCOR2|NCOR1	http://amigo.geneontology.org/amigo/term/GO:0044255
cilium assembly	Gene Ontology	GO:0042384	6	86	0.0643169	0.133019	SCLT1|POC1B|BBIP1|RSG1|FOPNL|SEPT2	http://amigo.geneontology.org/amigo/term/GO:0042384
female pregnancy	Gene Ontology	GO:0007565	6	86	0.0643169	0.133019	PGF|EPN1|PSG7|COL16A1|HFE|HPGD	http://amigo.geneontology.org/amigo/term/GO:0007565
cellular response to mechanical stimulus	Gene Ontology	GO:0071260	5	66	0.0661454	0.135264	AKT1|MAPK8|GADD45A|CASP8|CHEK1	http://amigo.geneontology.org/amigo/term/GO:0071260
DNA damage response, signal transduction by p53 class mediator resulting in cell cycle arrest	Gene Ontology	GO:0006977	5	67	0.0696421	0.140832	PML|PSMF1|PSMD9|PSME3|CDKN1A	http://amigo.geneontology.org/amigo/term/GO:0006977
cellular protein modification process	Gene Ontology	GO:0006464	7	110	0.0712805	0.141011	UBE2I|UEVLD|CDKL3|UBE2D3|UBA6|AKT1|PRKDC	http://amigo.geneontology.org/amigo/term/GO:0006464
toll-like receptor signaling pathway	Gene Ontology	GO:0002224	7	110	0.0712805	0.141011	IRF3|UBE2D3|CASP8|MAP3K7|IKBKG|UBE2V1|MAPK8	http://amigo.geneontology.org/amigo/term/GO:0002224
response to toxin	Gene Ontology	GO:0009636	5	68	0.0732388	0.143328	BAX|MPST|ASNS|CDKN1A|HDAC6	http://amigo.geneontology.org/amigo/term/GO:0009636
extracellular matrix disassembly	Gene Ontology	GO:0022617	7	112	0.0768586	0.147245	LAMA3|BMP1|COL4A2|LAMC2|COL16A1|BSG|LAMB3	http://amigo.geneontology.org/amigo/term/GO:0022617
chromatin organization	Gene Ontology	GO:0006325	7	112	0.0768586	0.147245	KANSL1|SUPT20H|SUPT7L|MEAF6|HMGA2|ING4|MORF4L2	http://amigo.geneontology.org/amigo/term/GO:0006325
aging	Gene Ontology	GO:0007568	7	113	0.0797409	0.151175	CYP1A1|SOCS2|CTSC|AKT1|ENO3|UCP3|GSN	http://amigo.geneontology.org/amigo/term/GO:0007568
phosphatidylinositol-mediated signaling	Gene Ontology	GO:0048015	8	137	0.0833978	0.156478	PI4KB|RFC4|CDKN1A|AKT1|AKT1S1|RHOA|TSC2|GSN	http://amigo.geneontology.org/amigo/term/GO:0048015
regulation of cell cycle	Gene Ontology	GO:0051726	6	93	0.0865282	0.159939	ARNTL|PLCB1|E2F5|BAX|ADARB1|TSC2	http://amigo.geneontology.org/amigo/term/GO:0051726
axon guidance	Gene Ontology	GO:0007411	16	334	0.0869996	0.159939	AP2S1|PTK2|CLASP2|NCK2|RAC1|SPTAN1|CACNB1|PAK1|MYL6|COL4A2|HRAS|AP2A2|RHOC|RHOA|AP2B1|MYL9	http://amigo.geneontology.org/amigo/term/GO:0007411
toll-like receptor 9 signaling pathway	Gene Ontology	GO:0034162	5	73	0.092701	0.167045	TNIP2|UBE2V1|MAPK8|IKBKG|MAP3K7	http://amigo.geneontology.org/amigo/term/GO:0034162
toll-like receptor 2 signaling pathway	Gene Ontology	GO:0034134	5	73	0.092701	0.167045	TNIP2|UBE2V1|MAPK8|MAP3K7|IKBKG	http://amigo.geneontology.org/amigo/term/GO:0034134
viral infectious cycle	Gene Ontology	GO:0019058	7	118	0.0950782	0.169124	XPO1|RPS24|RPL29|RPL32|PDCD6IP|RPL23|RPL26L1	http://amigo.geneontology.org/amigo/term/GO:0019058
proteasomal ubiquitin-dependent protein catabolic process	Gene Ontology	GO:0043161	5	74	0.0968829	0.169124	PML|UBE2I|CRBN|UBE2D3|ARNTL	http://amigo.geneontology.org/amigo/term/GO:0043161
T cell receptor signaling pathway	Gene Ontology	GO:0050852	6	96	0.0971868	0.169124	STK11|MAP3K7|IKBKG|UBE2V1|PAK1|RNF31	http://amigo.geneontology.org/amigo/term/GO:0050852
cellular metabolic process	Gene Ontology	GO:0044237	8	142	0.0975717	0.169124	ETFA|NDUFV1|UCP3|UXS1|IDH3B|MRI1|BSG|ATP5D	http://amigo.geneontology.org/amigo/term/GO:0044237
nuclear mRNA splicing, via spliceosome	Gene Ontology	GO:0000398	9	167	0.10117	0.173707	SNRPD2|NCBP2|RSRC1|PCF11|ZCCHC8|HNRNPH1|TXNL4A|PTBP1|TRA2B	http://amigo.geneontology.org/amigo/term/GO:0000398
oxidation-reduction process	Gene Ontology	GO:0055114	8	144	0.103601	0.176218	CYP1A1|NDOR1|HCCS|DHRS4|SCO2|MTO1|GMPR2|LOXL1	http://amigo.geneontology.org/amigo/term/GO:0055114
negative regulation of cell growth	Gene Ontology	GO:0030308	7	122	0.108444	0.182749	PSRC1|CDKN1A|STK11|NME6|PPARG|BMPR2|PML	http://amigo.geneontology.org/amigo/term/GO:0030308
autophagy	Gene Ontology	GO:0006914	5	77	0.109988	0.18365	ATG4B|AMBRA1|STK11|SUPT20H|ATG4D	http://amigo.geneontology.org/amigo/term/GO:0006914
water-soluble vitamin metabolic process	Gene Ontology	GO:0006767	5	78	0.114538	0.187662	DHFR|PCCA|THTPA|PNPO|NADSYN1	http://amigo.geneontology.org/amigo/term/GO:0006767
lipid catabolic process	Gene Ontology	GO:0016042	5	78	0.114538	0.187662	PLA2G6|PLCB1|PLD3|ASPG|BSCL2	http://amigo.geneontology.org/amigo/term/GO:0016042
Notch signaling pathway	Gene Ontology	GO:0007219	7	124	0.115484	0.187662	APH1A|DTX2|EPN1|MIB2|ITGB1BP1|NCOR2|NCOR1	http://amigo.geneontology.org/amigo/term/GO:0007219
insulin receptor signaling pathway	Gene Ontology	GO:0008286	8	149	0.119556	0.192346	ATP6V1F|PPM1A|SHC3|HRAS|STK11|AKT1|BAIAP2|TSC2	http://amigo.geneontology.org/amigo/term/GO:0008286
chromatin modification	Gene Ontology	GO:0016568	6	102	0.120481	0.192346	EHMT1|CHD3|BAG6|HDAC11|MORF4L2|NCOR1	http://amigo.geneontology.org/amigo/term/GO:0016568
positive regulation of protein phosphorylation	Gene Ontology	GO:0001934	6	103	0.124611	0.196748	PTK2|RAC1|HRAS|PLA2G6|AKT1|PAK1	http://amigo.geneontology.org/amigo/term/GO:0001934
G1/S transition of mitotic cell cycle	Gene Ontology	GO:0000082	8	151	0.126285	0.196748	PSMD9|CAMK2D|PSMF1|PSME3|DHFR|POLE|CDKN3|CDKN1A	http://amigo.geneontology.org/amigo/term/GO:0000082
positive regulation of NF-kappaB transcription factor activity	Gene Ontology	GO:0051092	7	127	0.126481	0.196748	TRIM14|AGER|MAP3K7|MAP3K13|IKBKG|UBE2V1|RNF31	http://amigo.geneontology.org/amigo/term/GO:0051092
viral transcription	Gene Ontology	GO:0019083	5	82	0.133612	0.204347	RPL29|RPS24|RPL26L1|RPL32|RPL23	http://amigo.geneontology.org/amigo/term/GO:0019083
RNA processing	Gene Ontology	GO:0006396	5	82	0.133612	0.204347	CCNL1|RBM6|RBM39|HNRNPH1|ADARB1	http://amigo.geneontology.org/amigo/term/GO:0006396
regulation of transcription from RNA polymerase II promoter	Gene Ontology	GO:0006357	13	283	0.14352	0.213375	SMARCC2|UBP1|CHD3|GABPB1|LRRFIP1|SUB1|CAMK2D|TARBP2|ZNF576|MED16|ELF2|ZNF76|CHD4	http://amigo.geneontology.org/amigo/term/GO:0006357
SRP-dependent cotranslational protein targeting to membrane	Gene Ontology	GO:0006614	6	108	0.146267	0.213375	RPS24|RPL29|RPL32|RPL23|SSR4|RPL26L1	http://amigo.geneontology.org/amigo/term/GO:0006614
protein dephosphorylation	Gene Ontology	GO:0006470	6	108	0.146267	0.213375	PPM1A|STYXL1|PTPMT1|PPM1K|SMEK1|SSH1	http://amigo.geneontology.org/amigo/term/GO:0006470
regulation of cell shape	Gene Ontology	GO:0008360	6	108	0.146267	0.213375	PTK2|C21orf2|PRPF40A|BAIAP2|FBLIM1|TAOK2	http://amigo.geneontology.org/amigo/term/GO:0008360
cell death	Gene Ontology	GO:0008219	10	207	0.14687	0.213375	OPTN|SPG7|TFG|ATP13A2|ANO10|PLA2G6|NDOR1|SYNE1|APTX|BSCL2	http://amigo.geneontology.org/amigo/term/GO:0008219
translational termination	Gene Ontology	GO:0006415	5	85	0.148786	0.213375	RPL32|RPS24|RPL29|RPL26L1|RPL23	http://amigo.geneontology.org/amigo/term/GO:0006415
vitamin metabolic process	Gene Ontology	GO:0006766	5	85	0.148786	0.213375	DHFR|PCCA|THTPA|PNPO|NADSYN1	http://amigo.geneontology.org/amigo/term/GO:0006766
translation	Gene Ontology	GO:0006412	12	259	0.148894	0.213375	RPS24|RPL29|AKT1|MRPS6|RPL32|WARS|RPL23|MRPL55|SSR4|RPL26L1|HARS|METTL17	http://amigo.geneontology.org/amigo/term/GO:0006412
positive regulation of transcription, DNA-dependent	Gene Ontology	GO:0045893	21	503	0.158866	0.223819	SMARCC2|PLCB1|PSRC1|NCOA1|PSMD9|TCF3|PPM1A|ZNF496|HMGA2|CREB5|CAMKK2|ELF2|RSF1|HNF1B|PPARG|ARNTL|MED16|UBE2V1|BRF1|USP21|SP100	http://amigo.geneontology.org/amigo/term/GO:0045893
regulation of small GTPase mediated signal transduction	Gene Ontology	GO:0051056	8	160	0.158902	0.223819	RALGDS|ARHGEF16|TIAM2|ARHGAP26|RHOC|RHOA|TSC2|MYO9B	http://amigo.geneontology.org/amigo/term/GO:0051056
proteolysis	Gene Ontology	GO:0006508	10	211	0.15987	0.223819	CD46|BMP1|SPG7|CAPN15|CTSC|TMPRSS4|CASP8|CAPN10|ATG4B|PDCD6	http://amigo.geneontology.org/amigo/term/GO:0006508
cell proliferation	Gene Ontology	GO:0008283	15	344	0.16547	0.22989	MVP|CYP1A1|TPX2|MRE11A|CDV3|POC1B|RAC1|CDC27|HRAS|NASP|PRMT5|AKT1|RAP1B|IL15RA|DAZAP1	http://amigo.geneontology.org/amigo/term/GO:0008283
small GTPase mediated signal transduction	Gene Ontology	GO:0007264	15	348	0.176161	0.242889	RAB27A|RALGDS|ARHGEF16|RAC1|DOCK3|HRAS|RSG1|RAP1B|TIAM2|SH2D3A|MYO9B|RHOC|RHOA|ARL4A|ARHGAP26	http://amigo.geneontology.org/amigo/term/GO:0007264
protein ubiquitination	Gene Ontology	GO:0016567	12	269	0.178818	0.244698	FBXL12|DTX2|SOCS2|KLHL17|ANAPC11|FBXO21|UBE2D3|UBA6|AKT1|MKRN3|CRBN|MED8	http://amigo.geneontology.org/amigo/term/GO:0016567
translational elongation	Gene Ontology	GO:0006414	5	91	0.181155	0.246046	RPL29|RPS24|RPL26L1|RPL32|RPL23	http://amigo.geneontology.org/amigo/term/GO:0006414
regulation of cell proliferation	Gene Ontology	GO:0042127	6	116	0.184136	0.246731	PTK2|BAG6|MFI2|JUP|BMPR2|CHEK1	http://amigo.geneontology.org/amigo/term/GO:0042127
negative regulation of cell proliferation	Gene Ontology	GO:0008285	16	378	0.184371	0.246731	STK11|NCK2|RARG|CDKN3|TSC2|AMBRA1|DDR1|WARS|ADARB1|PPARG|STK4|CDKN1A|ING4|PML|ITGB1BP1|HRAS	http://amigo.geneontology.org/amigo/term/GO:0008285
intracellular signal transduction	Gene Ontology	GO:0035556	16	379	0.187055	0.248497	KMT2C|MC1R|DEF8|CNIH4|SOCS2|STYXL1|PLCB1|ARHGEF5|RAC1|AKT1|STK4|MYO9B|MARK2|SH2B1|ITGB1BP1|TBL3	http://amigo.geneontology.org/amigo/term/GO:0035556
nuclear-transcribed mRNA catabolic process, nonsense-mediated decay	Gene Ontology	GO:0000184	6	117	0.189122	0.249422	RPS24|RPL26L1|NCBP2|RPL32|RPL23|RPL29	http://amigo.geneontology.org/amigo/term/GO:0000184
translational initiation	Gene Ontology	GO:0006413	6	119	0.199249	0.260887	RPS24|RPL26L1|RPL32|RPL23|PAIP1|RPL29	http://amigo.geneontology.org/amigo/term/GO:0006413
DNA replication	Gene Ontology	GO:0006260	7	147	0.211815	0.275359	NFIC|NASP|RFC4|POLE|ATR|ING4|CHEK1	http://amigo.geneontology.org/amigo/term/GO:0006260
respiratory electron transport chain	Gene Ontology	GO:0022904	5	100	0.233938	0.301963	ETFA|NDUFV1|UCP3|SCO2|ATP5D	http://amigo.geneontology.org/amigo/term/GO:0022904
cellular nitrogen compound metabolic process	Gene Ontology	GO:0034641	8	185	0.266447	0.341502	PSMD9|PSMF1|AFMID|OAZ3|PSME3|ASNS|MRI1|PYCR1	http://amigo.geneontology.org/amigo/term/GO:0034641
response to hypoxia	Gene Ontology	GO:0001666	7	159	0.27102	0.344934	PGF|CYP1A1|UCP3|PML|AGTRAP|TSC2|PAK1	http://amigo.geneontology.org/amigo/term/GO:0001666
carbohydrate metabolic process	Gene Ontology	GO:0005975	14	354	0.279722	0.353538	PCK2|NUP133|SLC37A4|HYAL3|GLA|NUP160|ENO3|ATHL1|NUP155|CHID1|B4GALT2|PKM|GAA|GBE1	http://amigo.geneontology.org/amigo/term/GO:0005975
response to virus	Gene Ontology	GO:0009615	5	114	0.322749	0.402331	HYAL3|BANF1|HMGA2|IKBKG|CYP1A1	http://amigo.geneontology.org/amigo/term/GO:0009615
protein complex assembly	Gene Ontology	GO:0006461	5	114	0.322749	0.402331	PML|NDUFAF1|VAMP3|HFE|TSPAN4	http://amigo.geneontology.org/amigo/term/GO:0006461
extracellular matrix organization	Gene Ontology	GO:0030198	12	312	0.333316	0.412677	LOXL1|ACTN1|LAMA3|BMP1|ITGB6|DDR1|PTK2|COL4A2|LAMC2|LAMB3|BSG|COL16A1	http://amigo.geneontology.org/amigo/term/GO:0030198
cytokine-mediated signaling pathway	Gene Ontology	GO:0019221	9	229	0.342843	0.420591	IRF3|EIF4E2|NUP133|CAMK2D|NUP160|NUP155|PML|IL15RA|SP100	http://amigo.geneontology.org/amigo/term/GO:0019221
defense response to virus	Gene Ontology	GO:0051607	6	145	0.34433	0.420591	IRF3|APOBEC3H|APOBEC3F|ADARB1|PML|POLR3H	http://amigo.geneontology.org/amigo/term/GO:0051607
transcription from RNA polymerase II promoter	Gene Ontology	GO:0006366	15	407	0.365584	0.443575	NFIC|IRF3|SLBP|ZNF576|NCBP2|CREB5|ARNTL|PCF11|ZNF496|BMPR2|ZNF768|MED16|MEF2D|ELF2|NCOR1	http://amigo.geneontology.org/amigo/term/GO:0006366
Fc-epsilon receptor signaling pathway	Gene Ontology	GO:0038095	11	294	0.376964	0.454354	RAC1|HRAS|MAP3K7|AKT1|AKT1S1|IKBKG|CDKN1A|UBE2V1|MAPK8|TSC2|PAK1	http://amigo.geneontology.org/amigo/term/GO:0038095
cellular protein metabolic process	Gene Ontology	GO:0044267	19	530	0.386069	0.458948	UBE2I|TIMM17B|RPS24|RPL29|TOMM6|PIGG|RAB27A|PFDN6|RPL32|ASNS|RPL23|PIGP|SSR4|PIGW|PFDN5|B4GALT2|RPL26L1|ALG11|EIF5A	http://amigo.geneontology.org/amigo/term/GO:0044267
response to lipopolysaccharide	Gene Ontology	GO:0032496	5	124	0.388341	0.458948	CYP1A1|OTUD5|IL18BP|TCF3|CASP8	http://amigo.geneontology.org/amigo/term/GO:0032496
negative regulation of neuron apoptotic process	Gene Ontology	GO:0043524	5	124	0.388341	0.458948	BIRC5|HRAS|KDM2B|AMBRA1|BAX	http://amigo.geneontology.org/amigo/term/GO:0043524
heart development	Gene Ontology	GO:0007507	6	153	0.391532	0.459734	TSC2|CASP8|PRKDC|PPARG|TCF25|TXNRD2	http://amigo.geneontology.org/amigo/term/GO:0007507
lipid metabolic process	Gene Ontology	GO:0006629	6	155	0.403347	0.470571	NAAA|ACSL4|PLA2G6|PPARG|UCP3|CHKA	http://amigo.geneontology.org/amigo/term/GO:0006629
regulation of apoptotic process	Gene Ontology	GO:0042981	6	166	0.467787	0.542276	ACTN1|PSMD9|PSMF1|PSME3|CASP8|CIDEB	http://amigo.geneontology.org/amigo/term/GO:0042981
post-translational protein modification	Gene Ontology	GO:0043687	7	201	0.495145	0.570357	UBE2I|PIGG|PIGP|PIGW|ALG11|B4GALT2|EIF5A	http://amigo.geneontology.org/amigo/term/GO:0043687
angiogenesis	Gene Ontology	GO:0001525	7	206	0.521187	0.596579	UBP1|PTK2|WARS|CASP8|MAP3K7|COL4A2|PDCD6	http://amigo.geneontology.org/amigo/term/GO:0001525
cell differentiation	Gene Ontology	GO:0030154	13	395	0.542117	0.616658	PGF|DAZAP1|STX2|BAG6|BMP1|AMBRA1|SUV39H2|CATSPER1|AKT1|UBE2V1|ELF2|ITGB1BP1|SEMA4G	http://amigo.geneontology.org/amigo/term/GO:0030154
brain development	Gene Ontology	GO:0007420	6	181	0.552194	0.62422	PLCB1|BAG6|KLHL17|AK2|PRKDC|BMPR2	http://amigo.geneontology.org/amigo/term/GO:0007420
inflammatory response	Gene Ontology	GO:0006954	10	307	0.560359	0.629539	PXK|ITGB6|AKT1|HYAL3|PRDX5|RAC1|AGER|TNIP2|LTB4R|IKBKG	http://amigo.geneontology.org/amigo/term/GO:0006954
Wnt receptor signaling pathway	Gene Ontology	GO:0016055	5	157	0.593832	0.663052	PPM1A|HMGXB4|MARK2|LRRFIP2|CTNNBIP1	http://amigo.geneontology.org/amigo/term/GO:0016055
cell surface receptor signaling pathway	Gene Ontology	GO:0007166	5	160	0.61064	0.677661	CBLC|HRAS|BSG|TRPV1|AGER	http://amigo.geneontology.org/amigo/term/GO:0007166
fibroblast growth factor receptor signaling pathway	Gene Ontology	GO:0008543	5	163	0.627038	0.691642	AKT1|CDKN1A|AKT1S1|TSC2|HRAS	http://amigo.geneontology.org/amigo/term/GO:0008543
platelet activation	Gene Ontology	GO:0030168	6	204	0.66809	0.732484	ACTN1|PTK2|RAC1|RAP1B|AKT1|RHOA	http://amigo.geneontology.org/amigo/term/GO:0030168
response to drug	Gene Ontology	GO:0042493	9	305	0.679097	0.740094	PGF|CYP1A1|TCF3|CDKN1A|XPO1|PPARG|ENO3|ATR|PFAS	http://amigo.geneontology.org/amigo/term/GO:0042493
blood coagulation	Gene Ontology	GO:0007596	14	469	0.686165	0.743345	RAB27A|ACTN1|PTK2|RAC1|HRAS|LRRC16A|RAP1B|GLG1|AKT1|SH2B1|F12|RHOA|BSG|ATP2B4	http://amigo.geneontology.org/amigo/term/GO:0007596
ion transmembrane transport	Gene Ontology	GO:0034220	5	179	0.707154	0.761551	ANO10|TRPV1|ATP2B4|ASIC3|ANO9	http://amigo.geneontology.org/amigo/term/GO:0034220
Fc-gamma receptor signaling pathway involved in phagocytosis	Gene Ontology	GO:0038096	5	201	0.796398	0.85193	PLA2G6|BAIAP2|PTK2|PAK1|RAC1	http://amigo.geneontology.org/amigo/term/GO:0038096
cell adhesion	Gene Ontology	GO:0007155	12	445	0.800439	0.85193	DCBLD1|LAMA3|ITGB6|RAC1|DDR1|NR2C2AP|SPECC1|IZUMO1|IL32|LAMC2|COL16A1|LAMB3	http://amigo.geneontology.org/amigo/term/GO:0007155
nervous system development	Gene Ontology	GO:0007399	7	278	0.814616	0.859654	SMARCC2|DPF1|SPG7|JUP|ARHGAP26|MEF2D|SEMA4G	http://amigo.geneontology.org/amigo/term/GO:0007399
transport	Gene Ontology	GO:0006810	9	349	0.817144	0.859654	TMED3|SLC37A4|CACNB1|ASIC3|ATP2B4|TMEM9|BAG6|TRPV1|AP4M1	http://amigo.geneontology.org/amigo/term/GO:0006810
in utero embryonic development	Gene Ontology	GO:0001701	5	220	0.854985	0.892655	POLE|EIF4E2|EPN1|NCOR2|SCO2	http://amigo.geneontology.org/amigo/term/GO:0001701
transmembrane transport	Gene Ontology	GO:0055085	15	578	0.86193	0.892655	SLC44A3|ANO9|NUP133|SLC37A4|NUP160|ASIC3|SLC26A6|ATP6V1F|ANO10|NUP155|SLC1A5|HEPH|CYB561|TRPV1|ATP2B4	http://amigo.geneontology.org/amigo/term/GO:0055085
negative regulation of apoptotic process	Gene Ontology	GO:0043066	12	475	0.863227	0.892655	PSMF1|PTK2|PSMD9|SOCS2|CDKN1A|HMGA2|PSME3|ASNS|AKT1|MAPK8|PRDX5|BIRC5	http://amigo.geneontology.org/amigo/term/GO:0043066
spermatogenesis	Gene Ontology	GO:0007283	8	346	0.887812	0.912891	ARNTL|DAZAP1|BAG6|HMGA2|CDK16|CATSPER1|OAZ3|KDM2B	http://amigo.geneontology.org/amigo/term/GO:0007283
signal transduction	Gene Ontology	GO:0007165	28	1045	0.89657	0.913714	PI4KB|HRAS|AKT1|ICOSLG|CHKA|PGF|OPTN|CSNK1E|ARHGAP26|MYO9B|PLCB1|HMGA2|DFFA|ASIC3|PPARG|STK4|STK24|ARRDC2|RHPN1|NCK2|TFG|STX2|RHBDL1|EBP|PVRL2|CANT1|BAIAP2|IL15RA	http://amigo.geneontology.org/amigo/term/GO:0007165
synaptic transmission	Gene Ontology	GO:0007268	9	389	0.898653	0.913714	SYPL1|PLCB1|AP2S1|CAMK2D|HRAS|EPB41L1|CORT|AP2A2|AP2B1	http://amigo.geneontology.org/amigo/term/GO:0007268
multicellular organismal development	Gene Ontology	GO:0007275	11	474	0.915814	0.92599	MC1R|ZNF7|BMP1|ITGB6|HMGA2|CATSPER1|ATR|MCL1|CNOT1|GPR161|ERMARD	http://amigo.geneontology.org/amigo/term/GO:0007275
positive regulation of cell proliferation	Gene Ontology	GO:0008284	8	429	0.974171	0.979553	PGF|PTK2|RARG|HRAS|ROMO1|ITGB1BP1|BIRC5|EIF5A	http://amigo.geneontology.org/amigo/term/GO:0008284
immune response	Gene Ontology	GO:0006955	5	476	0.999623	0.999623	HFE|CTSC|IL32|IKBKG|LTB4R	http://amigo.geneontology.org/amigo/term/GO:0006955
